# Supplementary material for: Transcriptome profiling reveals an integrated mRNA–lncRNA signature with predictive value for long-term survival in diffuse large B-cell lymphoma
Source: publisher site journal article supplement (doi:10.18632/aging.104100), 2020-11-18
Supplement: Supplementary file [file aging-v12i22-104100-supplementary-material-SD1.pdf]

## SUPPLEMENTARY FIGURE

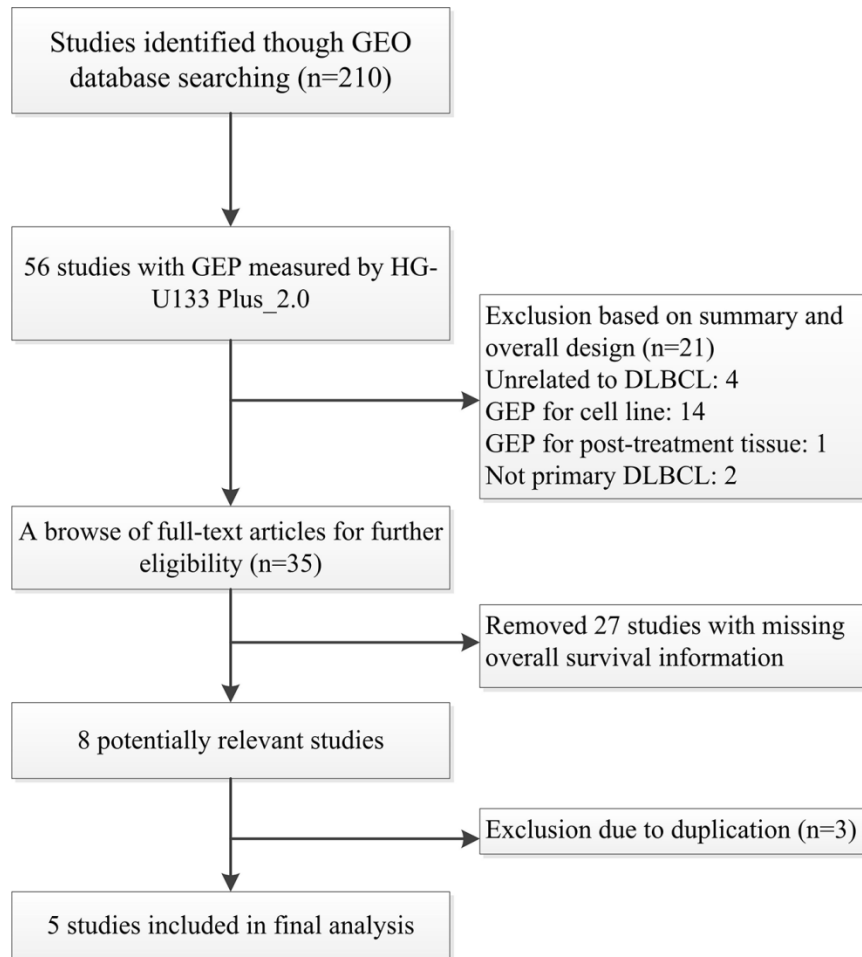

Supplementary Figure 1. Flow chart of the study selection process.
