# Supplementary material for: Transcriptome profiling reveals an integrated mRNA–lncRNA signature with predictive value for long-term survival in diffuse large B-cell lymphoma
Source: publisher site journal article supplement (doi:10.18632/aging.104100), 2020-11-18
Supplement: Supplementary file [file aging-v12i22-104100-supplementary-material-SD2.pdf]

## SUPPLEMENTARY TABLES

**Supplementary Table 1. Baseline characteristics of the training and validation datasets.**

| Variables                     | Training dataset | Validation dataset  | Components of validation dataset |                 |                  |                 |
|-------------------------------|------------------|---------------------|----------------------------------|-----------------|------------------|-----------------|
|                               | GSE10846 (n=412) | ComBatData* (n=832) | GSE31312 (n=470)                 | GSE23501 (n=69) | GSE87371 (n=221) | GSE98588 (n=72) |
| <b>age,year</b>               |                  |                     |                                  |                 |                  |                 |
| ≤60                           | 188 (45.6%)      | 369(44.4%)          | 200 (42.6%)                      | 28 (40.6%)      | 115 (52.0%)      | 26 (36.1%)      |
| >60                           | 224 (54.4%)      | 463 (55.6%)         | 270 (57.4%)                      | 41 (59.4%)      | 106 (48.0%)      | 46 (63.9%)      |
| <b>Sex</b>                    |                  |                     |                                  |                 |                  |                 |
| Female                        | 172 (41.7%)      | 323 (38.8%)         | 199 (42.3%)                      | 19 (27.5%)      | 105 (47.5%)      | -               |
| Male                          | 222 (53.9%)      | 437 (52.5%)         | 271 (57.7%)                      | 50 (72.5%)      | 116 (52.5%)      | -               |
| Unknown                       | 18 (4.4%)        | 72 (8.7%)           | 0 (0.0%)                         | 0 (0.0%)        | 0 (0.0%)         | 72 (100%)       |
| <b>Stage</b>                  |                  |                     |                                  |                 |                  |                 |
| I/II                          | 188 (45.6%)      | 314 (37.8%)         | 220 (46.8%)                      | -               | 71 (32.1%)       | 23 (31.9%)      |
| III/IV                        | 217 (52.7%)      | 427 (51.3%)         | 228 (48.5%)                      | -               | 150 (67.9%)      | 49 (68.1%)      |
| Unknown                       | 7 (1.7%)         | 91 (10.9%)          | 22 (4.7%)                        | 69 (100%)       | 0 (0.0%)         | 0 (0.0%)        |
| <b>No.of extranodal sites</b> |                  |                     |                                  |                 |                  |                 |
| <2                            | 351 (85.2%)      | 421 (50.6%)         | 366 (77.9%)                      | -               | -                | 55 (76.4%)      |
| ≥2                            | 30 (7.3%)        | 121 (14.5%)         | 104 (22.1%)                      | -               | -                | 17 (23.6%)      |
| Unknown                       | 31 (7.5%)        | 290 (34.9%)         | 0 (0.0%)                         | 69 (100%)       | 221 (100%)       | 0 (0.0%)        |
| <b>LDH</b>                    |                  |                     |                                  |                 |                  |                 |
| 0                             | 173 (42.0%)      | 179 (21.5%)         | 148 (31.5%)                      | -               | -                | 31 (43.1%)      |
| 1                             | 177 (43.0%)      | 319 (38.3%)         | 278 (59.1%)                      | -               | -                | 41 (56.9%)      |
| Unknown                       | 62 (15.0%)       | 334 (40.2%)         | 44 (9.4%)                        | 69 (100%)       | 221 (100%)       | 0 (0.0%)        |
| <b>ECOG</b>                   |                  |                     |                                  |                 |                  |                 |
| <2                            | 295 (71.6%)      | 432 (51.9%)         | 374 (79.6%)                      | -               | -                | 58 (80.6%)      |
| ≥2                            | 93 (22.6%)       | 110 (13.2%)         | 96 (20.4%)                       | -               | -                | 14 (19.4%)      |
| Unknown                       | 24 (5.8%)        | 290 (34.9%)         | 0 (0.0%)                         | 69 (100%)       | 221 (100%)       | 0 (0.0%)        |
| <b>IPI</b>                    |                  |                     |                                  |                 |                  |                 |
| 0-2                           | 228 (55.4%)      | 464(55.8%)          | 274 (58.3%)                      | 33 (47.8%)      | 119 (53.8%)      | 38 (52.8%)      |
| 3-5                           | 92 (22.3%)       | 318 (38.2%)         | 150 (31.9%)                      | 32 (46.4%)      | 102 (46.2%)      | 34 (47.2%)      |
| Unknown                       | 92 (22.3%)       | 50 (6.0%)           | 46 (9.8%)                        | 4 (5.8%)        | 0 (0.0%)         | 0 (0.0%)        |
| <b>Subtype</b>                |                  |                     |                                  |                 |                  |                 |
| GCB                           | 182 (44.2%)      | 372 (44.7%)         | 248 (52.8%)                      | 40 (58.0%)      | 84 (38.0%)       | -               |
| Non-GCB                       | 230 (55.8%)      | 388 (46.6%)         | 222 (47.2%)                      | 29 (42.0%)      | 137 (62.0%)      | -               |
| Unknown                       | 0(0.0%)          | 72 (8.7%)           | 0 (0.0%)                         | 0 (0.0%)        | 0 (0.0%)         | 72 (100%)       |
| <b>Overall survival,year</b>  |                  |                     |                                  |                 |                  |                 |
| median survival time          | 6.94             | 7.61                | 6.86                             | -               | -                | -               |

\*ComBatData is an integrated dataset, and it combined GSE31312, GSE23501,GSE87371 and GSE98588 using ComBat method.

Abbreviation: Stage, Ann Arbor stage; LDH, lactate dehydrogenase; ECOG, Eastern Cooperative Oncology Group; IPI, International Prognostic Index; GCB, germinal center B-cell-like.
